# Supplementary material for: Local and systemic changes in expression of resistance genes, nb-lrr genes and their putative microRNAs in Norway spruce after wounding and inoculation with the pathogen Ceratocystis polonica
Source: PubMed Central journal article supplement (PMC3431983; doi:10.1186/1471-2229-12-105), 2012-07-09
Supplement: 1471-2229-12-105-S1.pdf [file 1471-2229-12-105-S1.pdf]

## Supplement 1

Table s1.1 Selected Nb-LRR family genes in Norway spruce analysed by real time qRT-PCR

| Cluster | Group | Number | Protein ID | Nucleotide source sequence | Gene name    | Primers (5'→ 3'), F/ R                                       | Product length, bp                                       |     |
|---------|-------|--------|------------|----------------------------|--------------|--------------------------------------------------------------|----------------------------------------------------------|-----|
| 1       | 1     | 1      | ABK24805   | gi_116788244               | PaLRR2       | TGGCAAGCCGGAAGATGAGG/<br>CCAGCAGGGTTTCCAGCAACG               | 120                                                      |     |
| 2       | 2     | 3      | ABF73316   | gi_104642234               | PaLRR11      | GCACAAGCGTCCTGCCATT/<br>ATCCTTGCCCGTTGCCTTGG                 | 101                                                      |     |
|         |       | 4      | ABR18304   | gi_148910456               | PaLRR12      | AAAGTGGCCTTGCTTGCCTGA/<br>TGCGACAAAGTATTTTCATCATGCACCTT      | 113                                                      |     |
| 3       | 3     | 19     | ACN41041   | gi_224286674               | PaLRR13      | TGTGGGCAATCCAAGAGGAA/<br>CCACAGGGATGTAATGGCAAACC             | 97                                                       |     |
|         |       | 4      | ABR17329   | gi_148908431               | PaLRR17      | CATTGGCTTGACCCGATCCTCTC/<br>GCTTCAAATGCTTACTCCATGGTTCACA     | 95                                                       |     |
|         |       | 5      | 26         | ACN40981                   | gi_224286550 | PaLRR9                                                       | GGAGTGCTCAGGATCGAAGAAGATGC/<br>GCTTTGATGGACAACCACGCTCCTA | 111 |
| 3       | 6     | 27     | ABR16233   | gi_148906150               | PaLRR10      | GCCTGATGACCTGGGCAAGTTAAGG/<br>TCGCAAATGGAAGCTGGAAGCA         | 90                                                       |     |
|         |       | 30     | ABK24822   | gi_116788283               | PaLRR3       | CACATTGATCTTCAGGGATGCCACA/<br>CGGCAGCCATTCCAAATCGT           | 114                                                      |     |
|         |       | 32     | ABR18026   | gi_148909879               | PaLRR18      | GCACAACCGTTTCTACCTGTGAGAGAG/<br>CTGGCTGCTCCTCAAATCTTCCA      | 106                                                      |     |
| 3       | 7     | 36     | ABR18473   | gi_148910813               | PaLRR6       | TGGTGGAGGATCTCCCGCAAG/<br>TGCAATTGTGAAACTCGCAAATACAA         | 115                                                      |     |
|         |       | 37     | ABR18096   | gi_148910025               | PaLRR7       | TGCAATGAGTTGATGAAATTGGACTTG/<br>TGTACCAAATGGTCTGTGATGCTCTC   | 111                                                      |     |
| 4       | 8     | 39     | ACN39861   | gi_224284250               | PaLRR8       | TGCAAGAACTCAATTTCCAAGTTGC/<br>TTTCGCAAGAGGATAAATCCAATATTCTCA | 102                                                      |     |
|         |       | 9      | 40         | ABR16849                   | gi_148907432 | PaLRR20                                                      | TGGTGCAGCTGACAGGACTTCG/<br>TTCCGACACCCACCGGCATT          | 118 |
|         |       | 10     | 47         | ABR17027                   | gi_148907802 | PaLRR21                                                      | TCCTCCGTTGCCAATGCTCA/<br>GGGCAGACACCTTCACCAAAGGA         | 104 |
|         |       | 11     | 54         | ADE76430                   | gi_294461742 | PaLRR22                                                      | TGCCAAAGTCCCTCGGCAAC/<br>CCCACAACCTTCCAGCGATAACA         | 114 |

|   |    |    |          |              |         |                                                              |     |
|---|----|----|----------|--------------|---------|--------------------------------------------------------------|-----|
|   | 12 | 56 | ABR17471 | gi_148908727 | PaLRR23 | CGCCCTACGGTTGGAGGCTGA/<br>CGCAGTGCATTCTCCCGCTTG              | 93  |
| 5 | 13 | 57 | ABK24857 | gi_116788373 | PaLRR19 | AAACTCTGATCCCGTGAAGGCAAAC/<br>CAACATTTGGCCGGGTATGGAA         | 100 |
|   |    | 58 | ABK24560 | gi_116787569 | PaLRR24 | TCGACTCCGGGAATGCCCTCT/<br>AGCGTACTTCCATATCCTCGGCCTTG         | 90  |
|   | 14 | 60 | ABR18087 | gi_148910004 | PaLRR1  | TTCCAAGGCAGTGAAGCGTTAGCAG/<br>CCCGAATGGAACCAGAGCCAAG         | 90  |
|   |    | 62 | ABK25485 | gi_116790053 | PaLRR16 | TGGGCTTTCCGTGCTCTCCTT/<br>AGATAGCCAGGTCTCCAGGGTTGA           | 120 |
|   |    | 63 | ADE76117 | gi_294461100 | PaLRR14 | TGCTCTGCTGGATTGCGAGAGTT/<br>ACTGCACCCACGGGCTTCCA             | 106 |
|   |    | 65 | ABR17804 | gi_148909411 | PaLRR15 | CGACAGTAAGTTGTGGGTGTTCTCAAGG/<br>CAAACCTCGGAATGTTGAATGGCTGGT | 103 |
| 6 | 15 | 72 | ABR17008 | gi_148907764 | PaLRR4  | GGGATCGGCGCAAGCAACA/<br>GCTCTTCAGATTCACACATCCGTCCA           | 100 |
|   |    | 73 | ABR18194 | gi_148910225 | PaLRR5  | TGCCTGGTGGAGGTGGACAGG/<br>GCGCCAAAGACGACACGGATT              | 108 |

---
