# Supplementary material for: Local and systemic changes in expression of resistance genes, nb-lrr genes and their putative microRNAs in Norway spruce after wounding and inoculation with the pathogen Ceratocystis polonica
Source: PubMed Central journal article supplement (PMC3431983; doi:10.1186/1471-2229-12-105), 2012-07-09
Supplement: 1471-2229-12-105-S2.pdf [file 1471-2229-12-105-S2.pdf]

Table s1.2. Selected NB-LRR family genes in Norway spruce putatively regulated by specific miRNAs and analysed by real time qRT-PCR

| Target LRR gene | Nucleotide source sequence | miRNA ID      | Primers (5'→3'), F/ R                                | Product length, bp | miRNA primer sequence (F) |
|-----------------|----------------------------|---------------|------------------------------------------------------|--------------------|---------------------------|
| PaLRR25         | ES261905                   | pab-miR950-3p | TCTCCGTCAGGCGGGTGT/TTGAGGAAGGCAGTTTCAAGCAGAG         | 80                 | TCTGGGCCCCGGTGGTTTATGA    |
| PaLRR26         | DR563813                   | pab-miR951    | TGCAGAGCGTATTGGATCTTGCTTCT/ GGAGTGGGATGTGGACGAGGATG  | 88                 | TGTTCTTGACGTCTGGACCACG    |
| PaLRR27         | EX326419                   | pab-MIR3693   | GGAGCTGCTCGTAGGTGAGGGATG/ GAAGTTTGCTCCATTTGAGCGCTTGT | 97                 | AGAGGGTGCTCATGAACTGCTC    |
| PaLRR28         | EX427311                   | pab-MIR3697   | CCCTCGCATCCTCCTCATCCA/ TGGCTGGCGAGACCTTTCTTTACATC    | 106                | TAGCCCCTGACTTCAACATGAG    |
| PaLRR29         | DR499063                   | pab-MIR3705   | CCGTAAACTTGCCGCCATCCA/ CAGCCACGATATGACCCCGACA        | 101                | GTAAGTGTTATGATCTGGAC      |

Table s2. Selected miRNAs putatively targeting LRR family genes in Norway spruce (Their identification and miRNA precursors are shown in Yakovlev et al., 2010)

| miRNA ID      | Sequence               | Length, nt | miRNA containing EST | Target                            | Target gene function                                                                | Score/E-value         |
|---------------|------------------------|------------|----------------------|-----------------------------------|-------------------------------------------------------------------------------------|-----------------------|
| pab-miR950-3p | TCTGGGCCCGGTGGTTTATGA  | 22         | <u>ES261905</u>      | <u>DR543641</u>                   | <u>gi 321530320 ADW94527.1 putative TIR-NBS-LRR protein [Pinus monticola]</u>       | 58.5 bits (140)/3e-07 |
| pab-miR951    | TGTTCTTGACGTCTGGACCACG | 22         | <u>DR563813</u>      | <u>EX417324</u><br>(4 mismatches) | <u>gb AAM28917.1  putative TIR/NBS/LRR disease resistance protein [Pinus taeda]</u> | 157(396)/6e-37        |
| pab-MIR3693   | AGAGGGTGCTCATGAACTGCTC | 22         | <u>EX326419</u>      | <u>DR492284</u><br>(2 mismatches) | <u>gb AAY78890.1  CC-NBS-LRR resistance-like protein [Pinus lambertiana]</u>        | 311(796)/5e-83        |
| pab-MIR3697   | TAGCCCCTGACTTCAACATGAG | 22         | <u>EX427311</u>      | <u>EX417859</u><br>(3 mismatches) | <u>gb AAM28917.1  putative TIR/NBS/LRR disease resistance protein [Pinus taeda]</u> | 147(372)/2e-42        |
| pab-MIR3705   | GTAAGTGGTTATGATCTGGAC  | 21         | <u>DR499063</u>      | <u>DR491334</u><br>(1 mismatch)   | <u>gb AAM28917.1  putative TIR/NBS/LRR disease resistance protein [Pinus taeda]</u> | 212(539)/3e-53        |
